# Supplementary material
Source: PubMed Central journal article supplement (PMC2556830)
Supplement: pp.108.120691_1.pdf [file pp.108.120691_1.pdf]

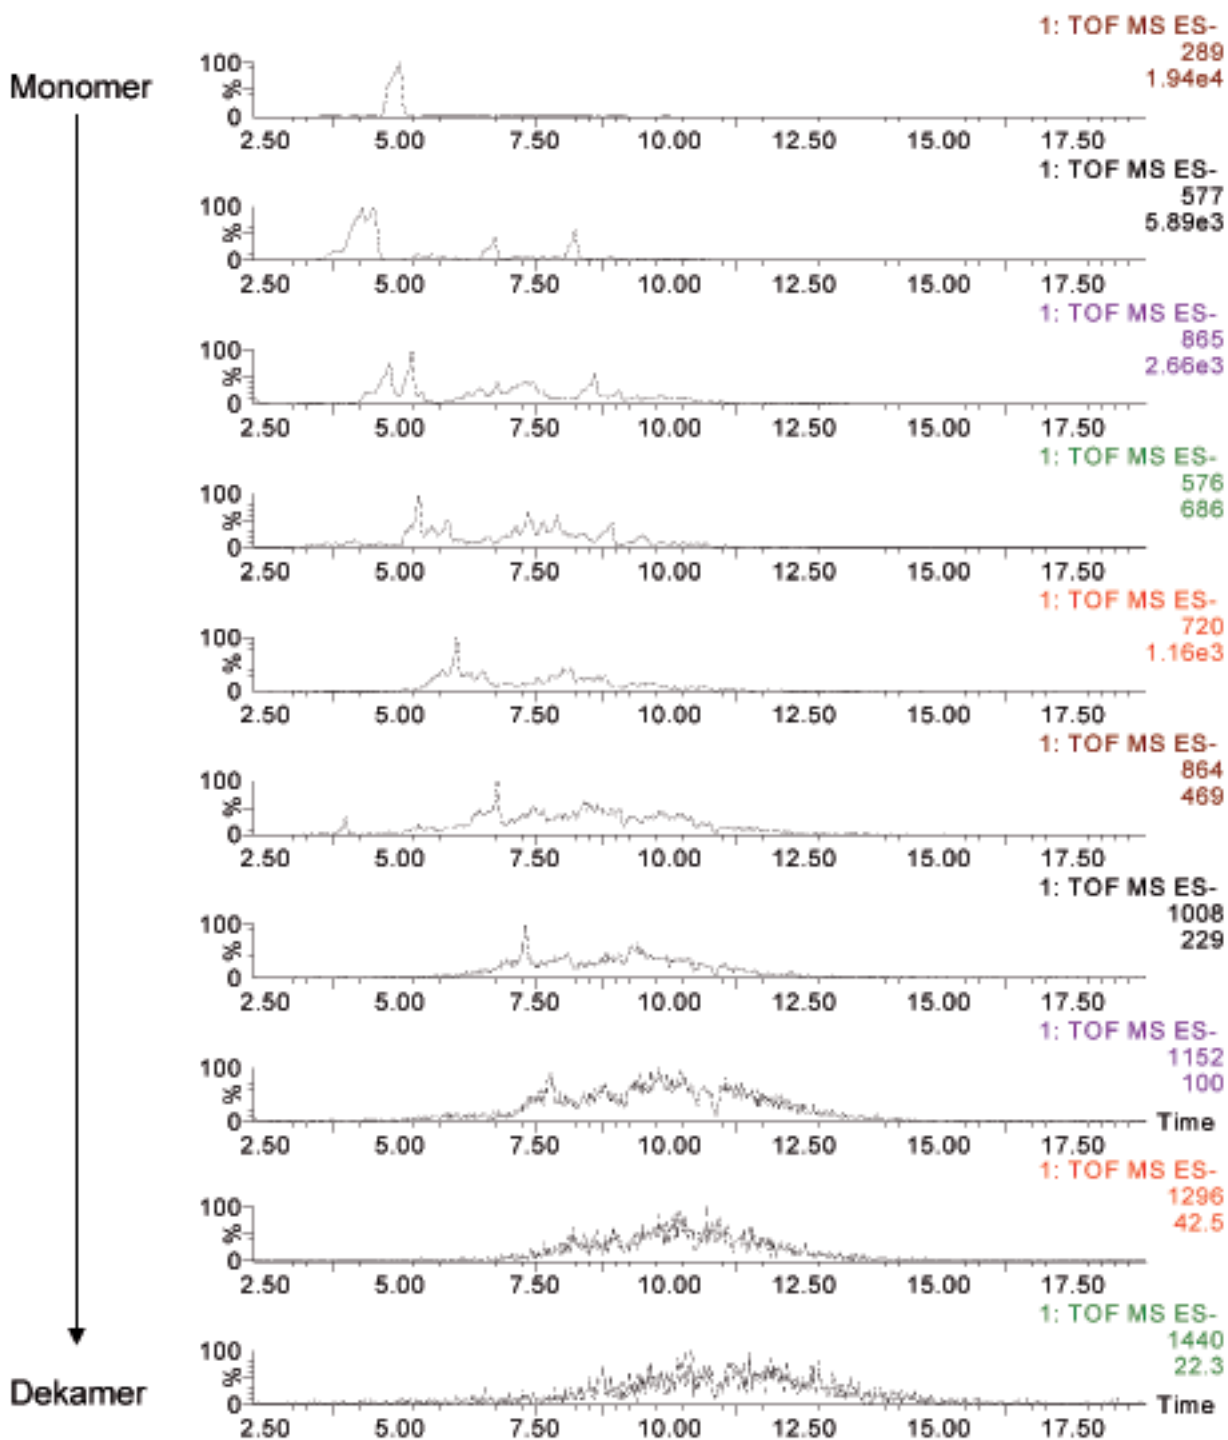

**Figure S1. Reconstructed ion chromatograms (RICs) of condensed tannin polymers.** The extracted ES(-) m/z signals correspond to monomer (289, [M-H]<sup>-</sup>), dimer (577, [M-H]<sup>-</sup>), trimer (865, [M-H]<sup>-</sup>), tetramer (576, [M-2H]<sup>2-</sup>), pentamer (720, [M-2H]<sup>2-</sup>), heksamer (864, [M-2H]<sup>2-</sup>), heptamer (1008, [M-2H]<sup>2-</sup>), oktamer (1152, [M-2H]<sup>2-</sup>), nonamer (1296, [M-2H]<sup>2-</sup>), dekamer (1440, [M-2H]<sup>2-</sup>)
