# Supplementary material
Source: PubMed Central journal article supplement (PMC2556830)
Supplement: pp.108.120691_2.pdf [file pp.108.120691_2.pdf]

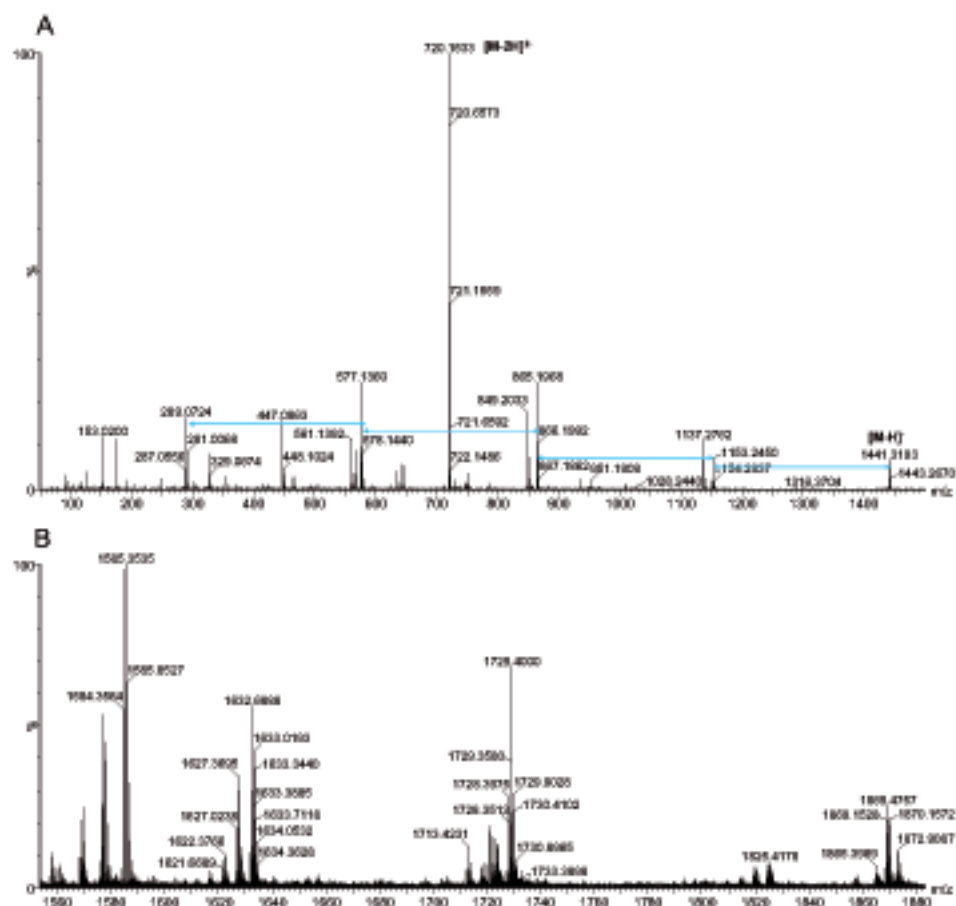

**Figure S2. Procyanidin pentamer MS spectrum.** The single charged ( $m/z$  1441) and double charged ( $m/z$  720) molecular ions are marked on the spectrum. The blue arrows show the fragmentation of catechin units, 288 amu each (A). Tentative procyanidin oligomers larger than ten units (B).
