# Supplementary material
Source: PubMed Central journal article supplement (PMC2556830)
Supplement: pp.108.120691_3.pdf [file pp.108.120691_3.pdf]

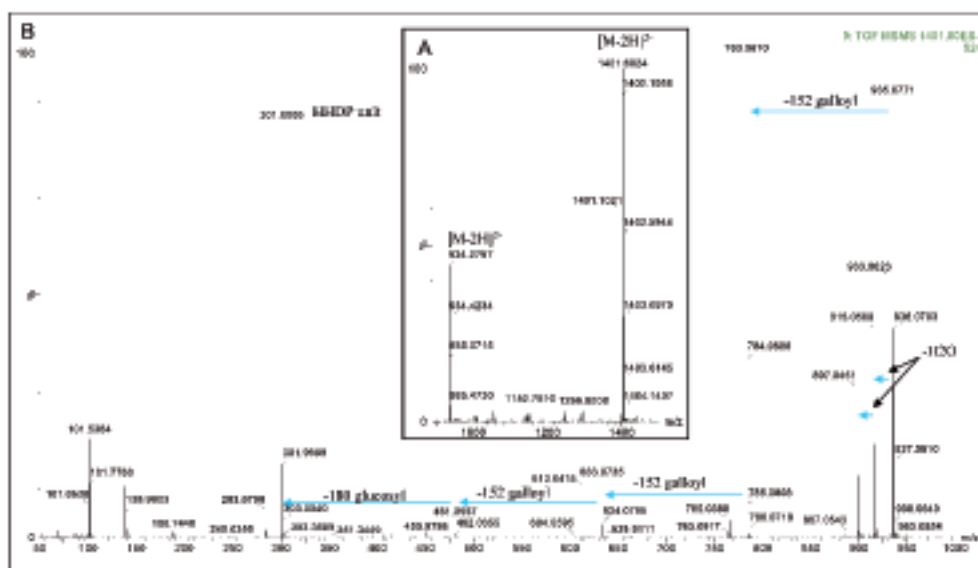

**Figure S3.** Ellagitannin (tentatively identified as Lambertian C) MS spectrum (A). MS/MS of m/z 1401 ion. Typical ellagitannin fragmentation is marked in the spectrum (B).
